# Supplementary material
Source: Research Square preprint supplement (doi:10.21203/rs.3.rs-8897343/v1)
Supplement: Supplementary file 1 [file 7fae0555de700ddfa1c48925.docx]

# STUDY QUESTIONNAIRE

1. **Sociodemographic details**

- Name
- Age(in years)
- Sex
  1. Male
  2. Female
- Religion

1. Hindu
2. Muslim
3. Christian
4. Others

- Place of residence

1. Rural
2. Urban

- Marital status

1. Unmarried
2. Married
3. Separated/Widowed
4. Divorced

- Occupation
- Education status

1. Illiterate/no formal schooling
2. Upto primary
3. Upto middle
4. High school
5. Intermediate/diploma
6. Graduate & above

- Type of Family: 1. Nuclear 2. Joint 3. Three-generation
- Total monthly income(in INR)_________________
- Socioeconomic status (as per BG prasad scale,2024)

1. Upper class(I)
2. Upper middle class(II)
3. Middle class(III)
4. Lower Middle class(IV)
5. Lower class(V)

# **C linical and Anthropometric details**

Clinical details

- Duration of Illness(in years)
- Co-morbidity
  1. HTN
  2. Coronary Artery Disease/Heart Disease
  3. Thyroid disease
  4. Others Anthropometric details
  - Weight (in Kg)
  - Height (in ms)
  - BMI(Kg/m2)
  - Waist circumference(in cms)
  - Waist to Hip ratio
  - MUAC(in cms)

# MUST score

1. **BMI (kg/m2)-score**

1. >20. = (0)

2. 18.5-20. = (+1)

3. <18.5. = (+2)

# Weight loss(in 3-6 months) - score

1.Less than 5% =(0)

2. 5 - 10%=(1)

3. More than 10%=(2)

1. **Acute Disease score**

Patient is likely ill and there has been or is likely to be no nutritional intake for >5 days

1. No=0

2.Yes=2

**D . Total score & Risk**

0 =*Low Risk*

1 =*Medium Risk*

≥2 =*High Risk*
